# Supplementary material for: CTHRC1 activates pro-tumorigenic signaling pathways in hepatocellular carcinoma
Source: PubMed Central journal article supplement (PMC5739634; doi:10.18632/oncotarget.22164), 2017-10-27
Supplement: oncotarget-08-105238-s001.pdf [file oncotarget-08-105238-s001.pdf]

# CTHRC1 activates pro-tumorigenic signaling pathways in hepatocellular carcinoma

## SUPPLYMENTARY METARIALS

A

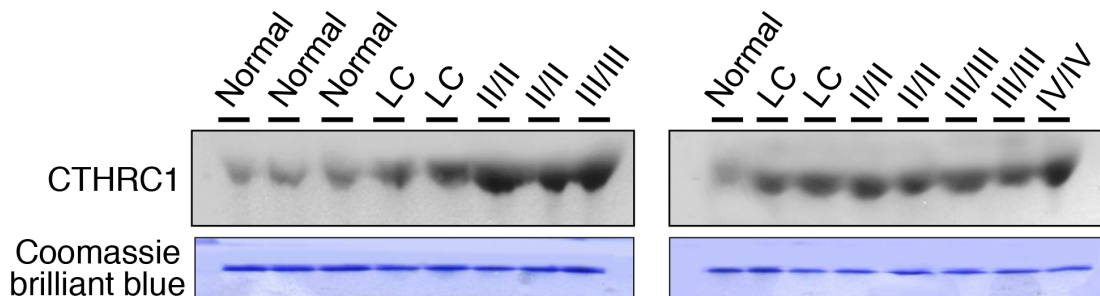

B

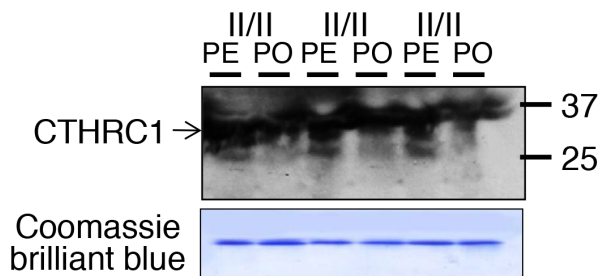

**Supplementary Figure 1: Western blot analysis of secreted CTHRC1 expression in the serum of HCC patients. (A)** High expression of secreted CTHRC1 in the serum of HCC patients compared with normal control serum. **(B)** Secreted CTHRC1 in the serum of HCC patients was decreased after surgery (PE: presurgery, PO: postsurgery).

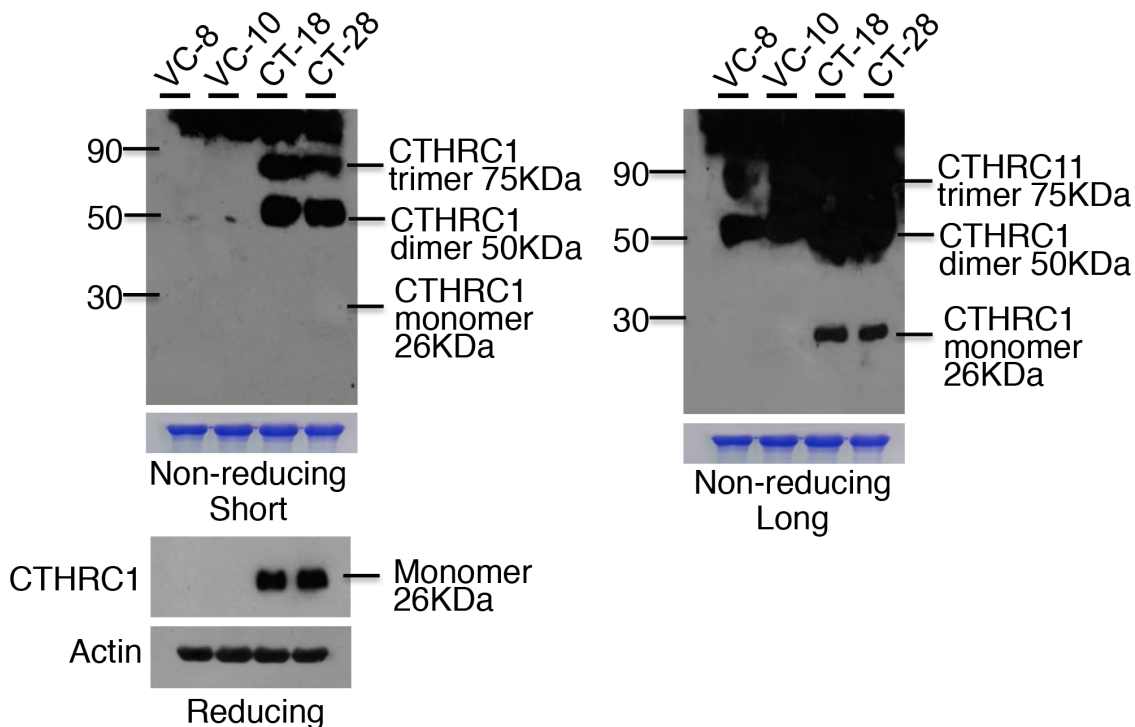

**Supplementary Figure 2: Western blot analysis of secreted CTHRC1 protein in the conditioned medium of HepG2 cells.** Samples were resolved by 12% SDS-PAGE under non-reducing condition, after which the blot was probed with anti-CTHRC1 antibodies. The three forms of CTHRC1 were 26, 50, and 75 kDa in size, corresponding to CTHRC1 monomers, homodimers, and homotrimers, of CTHRC1, respectively. Short, short exposure; Long, long exposure.

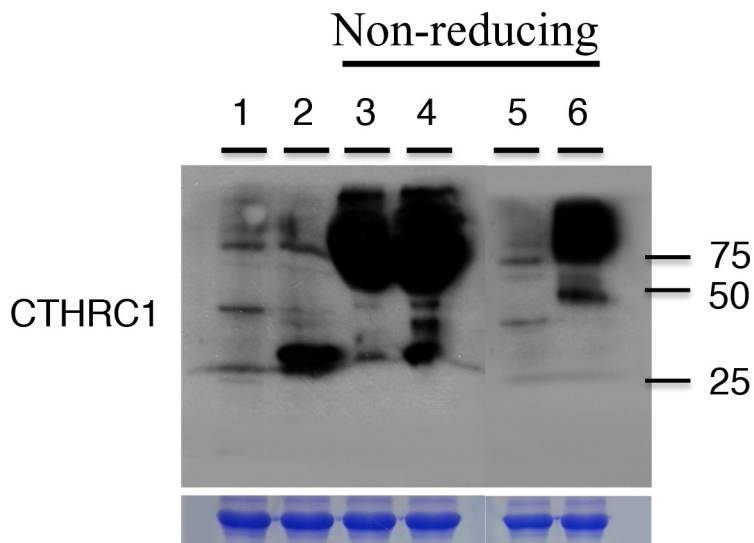

**Supplementary Figure 3: Western blot analysis of CTHRC1 protein in the cell lysate and conditioned medium of HepG2 cells infected with adenovirus expressing CTHRC1.** Only the 26 kDa form of CTHRC1 was detected in the cell lysate, whereas three forms of CTHRC1 were detected in the conditioned medium under non-reducing condition. The three forms of CTHRC1 were 26, 50, and 75 kDa, corresponding to CTHRC1 monomer, homodimer, and heterodimeric, respectively (lane 1, Ad-LacZ cell lysate; lane 2, Ad-CTHRC1 cell lysate; lane 3, Ad-LacZ cell supernatant ; lane 4, Ad-CTHRC1 cell supernatant; lane 5, Ad-LacZ cell lysate; lane 6, Ad-CTHRC1 cell lysate).

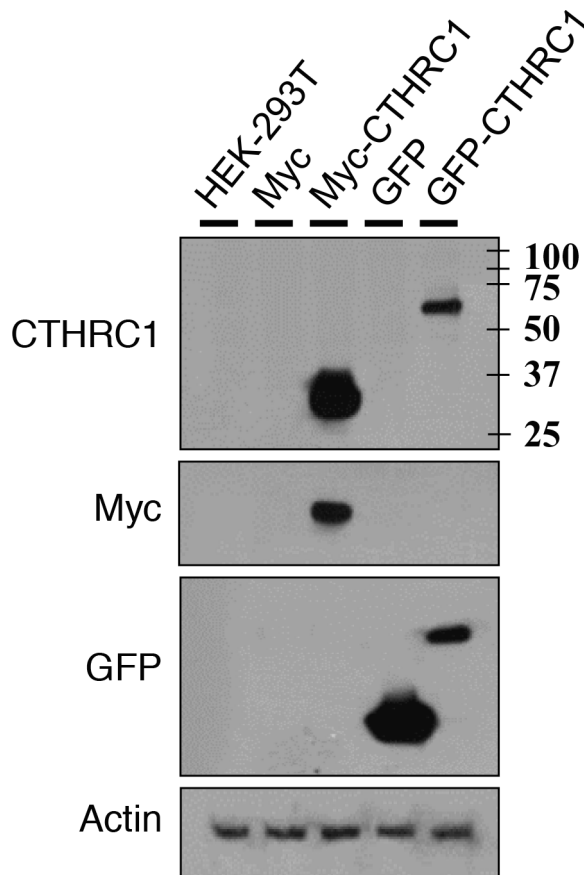

**Supplementary Figure 4: Specific immunoreactivity for CTHRC1.** Specific immunoreactivity of anti-CTHRC1 against CTHRC1 determined by Western blot analysis. Protein lysates were prepared from HEK293T cells transfected with either GFP or c-Myc vector alone or GFP- or c-Myc-tagged CTHRC1. The membranes were incubated with anti-GFP, anti-Myc, or anti-CTHRC1 antibodies. The numbers on the right correspond to molecular weight markers.

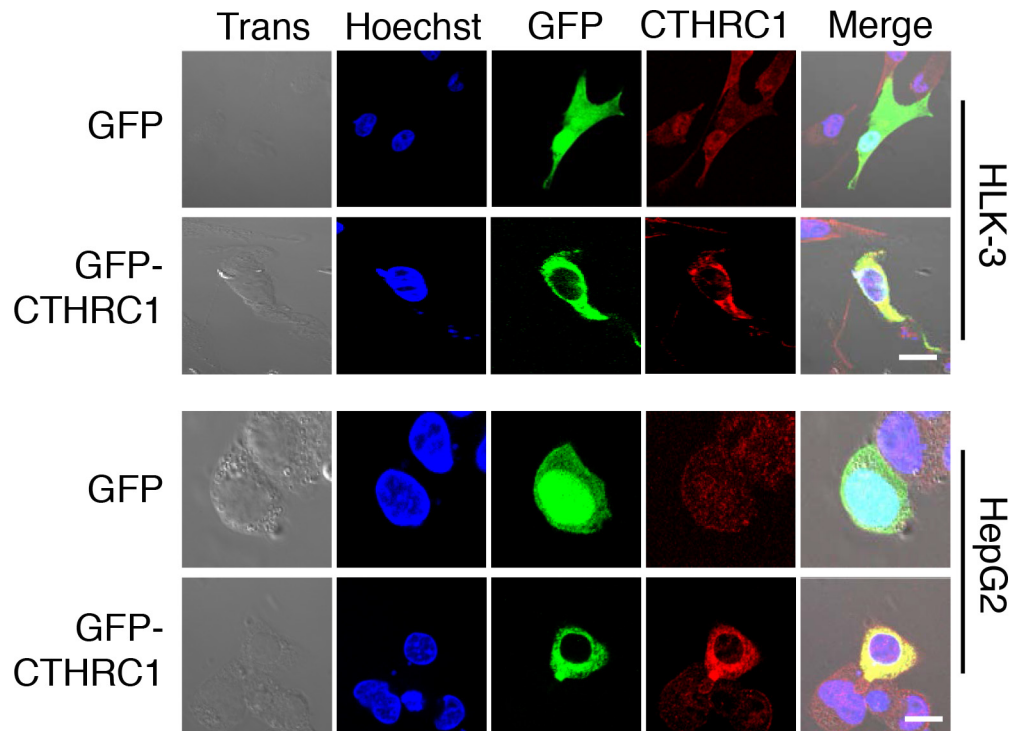

**Supplementary Figure 5: Cellular localization of CTHRC1.** HLK-3 and HepG2 cells were transfected with the GFP-tagged CTHRC1 expression vector (GFP-CTHRC1) or empty vector control (GFP), and antibody immunoreactivity (red) was assayed by immunofluorescence. Trans, transmission; Bar, 20  $\mu$ m.

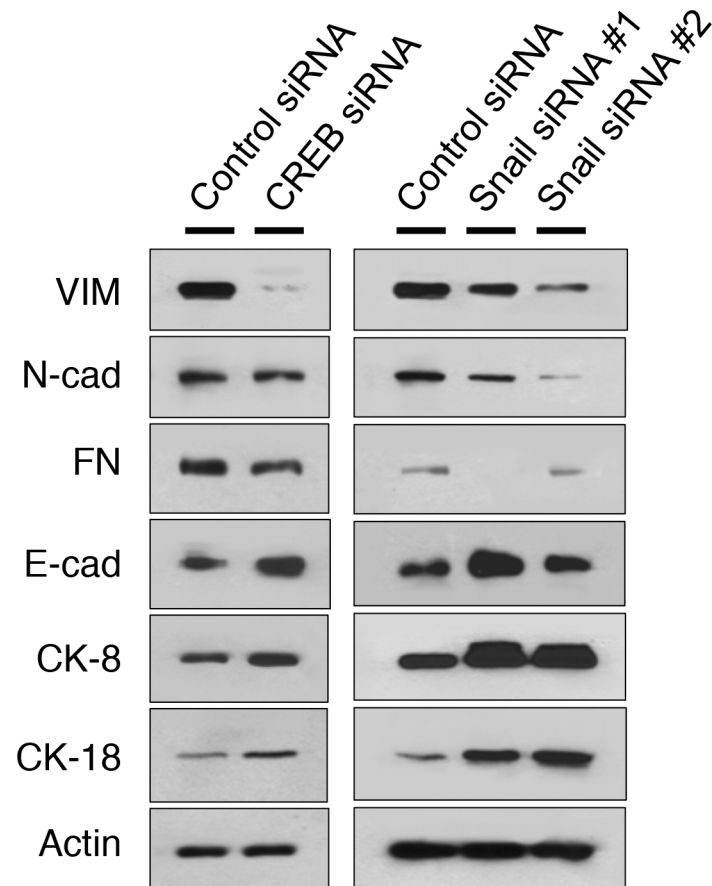

**Supplementary Figure 6: Changes of EMT maker expressions by CREB or snail.** Western blot analyses showed an acquisition of epithelial and a loss of mesenchymal marker proteins after transfection with siRNA of CREB or Snail, compared with control siRNA in HepG2 cells. VIM, vimentin; N-cad, N-cadherin; FN, fibronectin; E-cad, E-cadherin; CK, cytokeratin

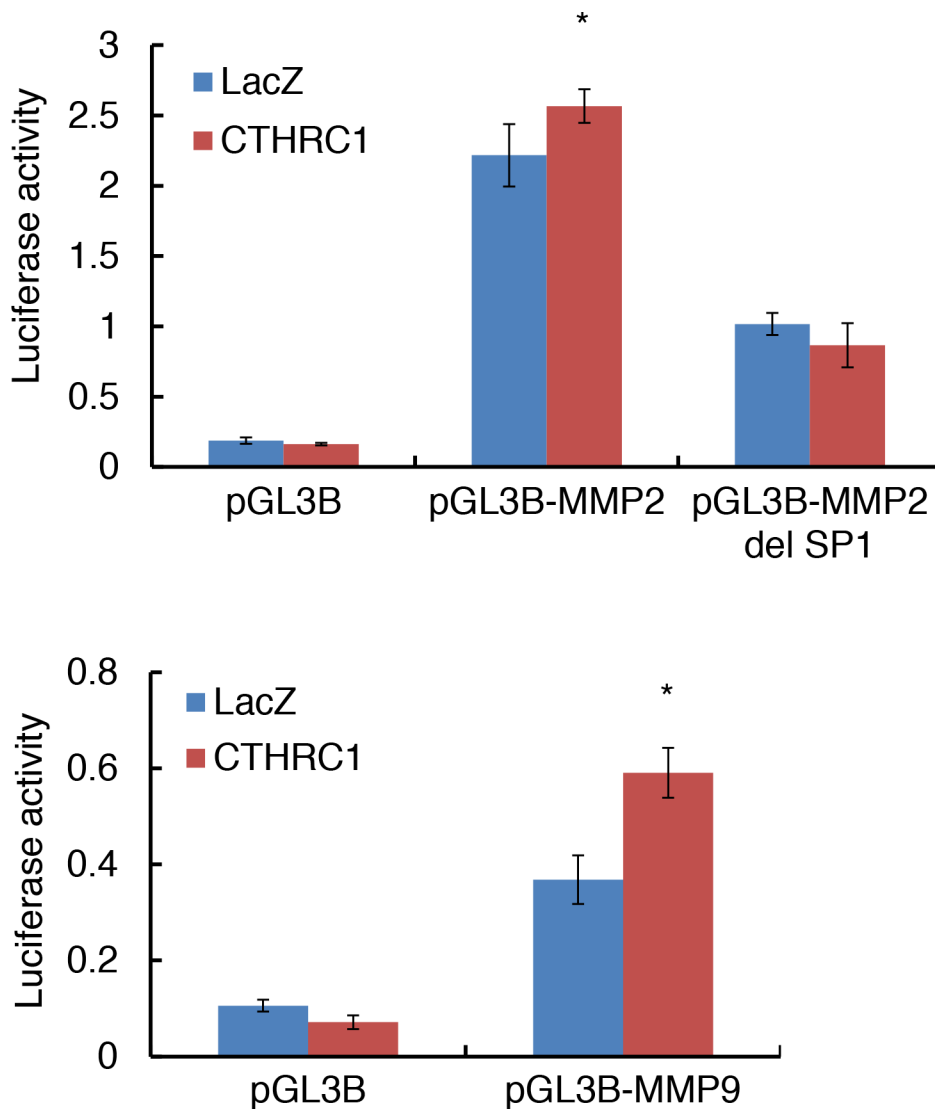

**Supplementary Figure 7: Transcriptional promotion of MMP by CTHRC1.** Transcriptional regulation of MMP2 was assessed in HepG2 cells using a luciferase reporter (pGL3B-MMP2-luc, pGL3B-MMP2 del SP1-luc) and a control (pGL3B) (upper panels). Luciferase reporter (pGL3B-MMP9-luc) and pGL3B were used for the assay of MMP9 transcriptional regulation.(lower panels). Each value represents the mean  $\pm$  SEM from three independent experiments in duplicate; \* $P < 0.05$ .

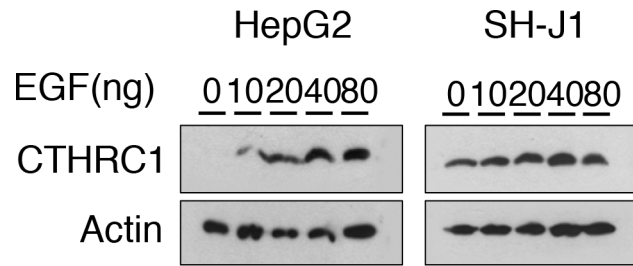

**Supplementary Figure 8: EGF-induced CTHRC1 expression in HepG2 and SH-J1 cells.** Cells were treated with EGF at the indicated concentrations for 4 days.



**Supplementary Table 1: Correlation of *CTHRC1* expression with various clinicopathological features of HCC specimens by real-time RT-PCR analysis**

|                           |          | Total | Median | Mean  | Lower 95% CI of mean | Upper 95% CI of mean | P-Value   |
|---------------------------|----------|-------|--------|-------|----------------------|----------------------|-----------|
| Age (median)              | ≤58      | 65    | 4.773  | 14.01 | 8.597                | 19.42                | .7877     |
|                           | >58      | 63    | 4.363  | 15.46 | 9.253                | 21.66                |           |
| Sex                       | Male     | 110   | 4.568  | 13.86 | 9.643                | 18.08                | .7164     |
|                           | t        | 18    | 4.821  | 19.98 | 6.059                | 33.9                 |           |
| HBV                       | Positive | 73    | 3.407  | 13.58 | 8.492                | 18.67                | .0806     |
|                           | Negative | 55    | 6.454  | 16.24 | 9.478                | 23                   |           |
| Liver cirrhosis           | yes      | 39    | 2.094  | 11.8  | 4.143                | 19.45                | .0394*    |
|                           | no       | 89    | 5.917  | 15.78 | 11.06                | 20.5                 |           |
| Tumor size(cm)            | <3       | 52    | 1.943  | 9.676 | 4.236                | 15.12                | .0034**   |
|                           | 3~5      | 46    | 1.346  | 16.65 | 9.389                | 23.91                |           |
|                           | >5       | 30    | 7.433  | 20.52 | 10.87                | 30.17                |           |
| ES Grade                  | I        | 8     | 0.8285 | 1.117 | 0.4238               | 1.811                | <.0001*** |
|                           | II       | 51    | 3.407  | 10.37 | 5.594                | 15.14                |           |
|                           | III      | 63    | 6.604  | 18.69 | 11.68                | 25.7                 |           |
|                           | IV       | 6     | 24.32  | 28.23 | 11.31                | 45.03                |           |
| Recurrence                | yes      | 53    | 7.181  | 19.22 | 11.75                | 26.7                 | .1025     |
|                           | no       | 75    | 4.116  | 11.63 | 7.343                | 15.92                |           |
| Tumor number              | 1        | 117   | 4.363  | 15.14 | 10.81                | 19.46                | .3743     |
|                           | >1       | 11    | 4.773  | 10.33 | 1.69                 | 22.36                |           |
| Fibrous capsule formation | yes      | 96    | 3.583  | 13.1  | 6.527                | 14.05                | .0653     |
|                           | no       | 32    | 7.108  | 19.58 | 10.15                | 29.01                |           |
| Capsular infiltration     | yes      | 67    | 4.116  | 15.23 | 9.346                | 21.1                 | .8918     |
|                           | no       | 61    | 5.917  | 14.17 | 8.456                | 19.88                |           |
| Microvessel invasion      | yes      | 66    | 4.8    | 19.91 | 12.97                | 26.85                | .0457*    |
|                           | no       | 62    | 3.592  | 9.197 | 5.521                | 12.87                |           |
| Intrahepatic metastasis   | yes      | 27    | 10.52  | 30.18 | 17.63                | 42.73                | .0051**   |
|                           | no       | 101   | 3.451  | 10.59 | 6.957                | 14.22                |           |
| Stage (AJCC)              | I/II     | 100   | 3.114  | 9.418 | 5.997                | 12.84                | <.0001*** |
|                           | III/IV   | 28    | 24.27  | 32.95 | 21.33                | 44.57                |           |
| AFP                       | <200     | 90    | 3.583  | 10.9  | 6.859                | 14.94                | .0545     |
|                           | ≥200     | 36    | 7.829  | 19.89 | 10.91                | 28.87                |           |
|                           | nd       | 2     |        |       |                      |                      |           |

HBV, hepatitis B virus; AFP, serum alpha-fetoprotein.

Differences between subgroups were tested by Mann-Whitney or Kruskal-Wallis tests.

\* $p < 0.05$ ; \*\* $p < 0.001$ ; \*\*\* $p < 0.0001$ . nd, not determined.
